# Supplementary material
Source: PubMed Central journal article supplement (PMC2148415)

Induction time

0 h

3 h

6 h

16 h

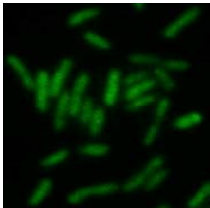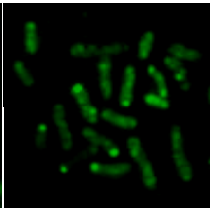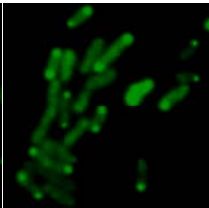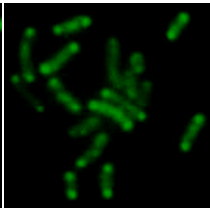

Unipolar (%)

0.3

30.3

14.6

6.5

Dipolar (%)

0.8

17.2

39.9

56.3

Supplement: pnas_0701738104_1.pdf [file pnas_0701738104_1.pdf]
